# Supplementary material for: Growth phase diagram and upconversion luminescence properties of NaLuF4:Yb3+/Tm3+/Gd3+ nanocrystals
Source: Royal Society of Chemistry journal article supplement (doi:10.1039/c7ra07902h), 2017-01-01
Supplement: c7ra07902h1.pdf [file c7ra07902h1.pdf]

# Supporting Information

## **Growth Phase Diagram and Upconversion Luminescence Property of NaLuF<sub>4</sub>:Yb<sup>3+</sup>/Tm<sup>3+</sup>/Gd<sup>3+</sup> Nanocrystals**

Yangyang Li,<sup>a</sup> Yanhui Dong,<sup>a</sup> Tuerxun-Aidilibike,<sup>ab</sup> Xiaohui Liu,<sup>a</sup> Junjie Guo,<sup>a</sup> Weiping Qin<sup>\*a</sup>

*a. State Key Laboratory on Integrated Optoelectronics, College of Electronic Science and Engineering, Jilin University, Changchun, Jilin 130012, China. E-mail: wpqin@jlu.edu.cn*

*b. Yili Normal University, Electronic and Information Engineering, Yining, Xinjiang 835000, China.*

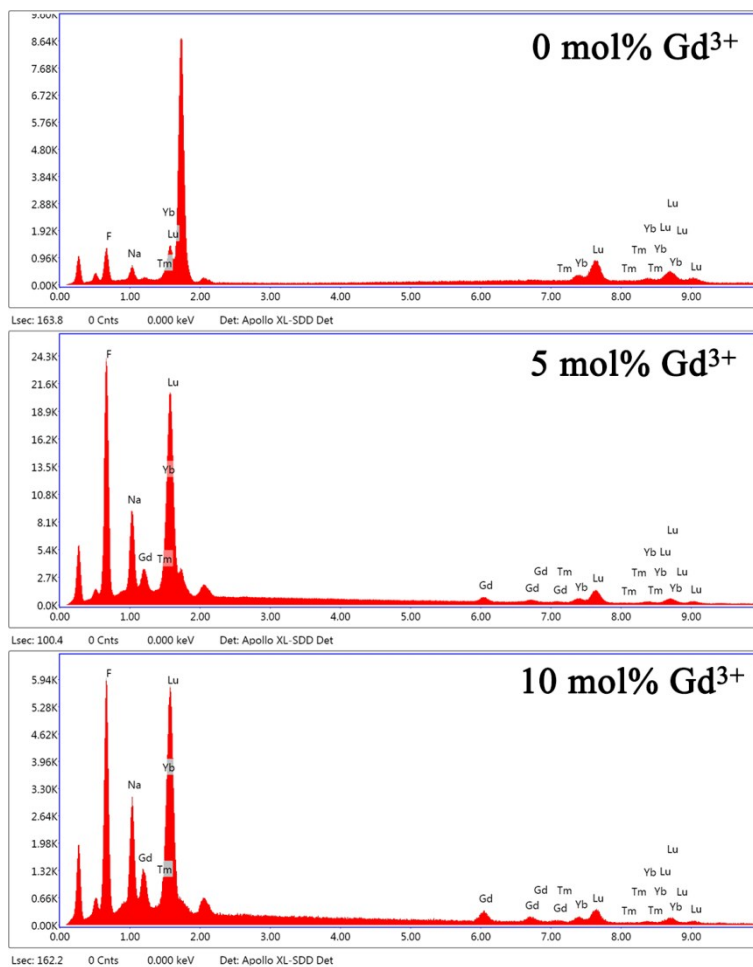

Fig. S1 EDX spectra of NaLuF<sub>4</sub>:20%Yb<sup>3+</sup>, 0.5%Tm<sup>3+</sup>, x%Gd<sup>3+</sup> (x=0, 5, 10).

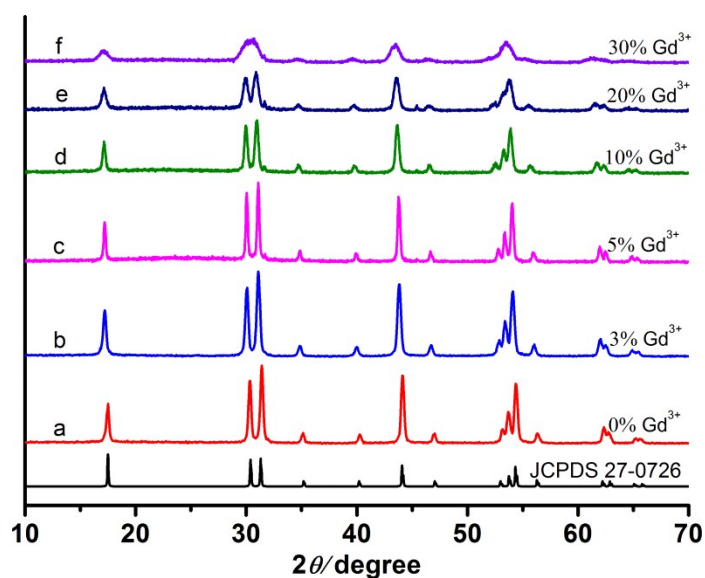

Fig. S2 XRD patterns of NaLuF<sub>4</sub>:20%Yb<sup>3+</sup>, 0.5%Tm<sup>3+</sup>, x%Gd<sup>3+</sup> with (a) x=0, (b) x=3, (c) x=5, (d) x=10, (e) x=20, (f) x=30 and the standard diffraction pattern for the β-phase NaLuF<sub>4</sub> (JCPDS 27-0726).

It can be observed from Fig. S2 that all the patterns match well with the standard hexagonal

NaLuF<sub>4</sub> pattern of JCPDS 27-0726, indicating the samples of different Gd<sup>3+</sup> concentrations are pure β-phase. As shown in Fig. S2b-f, with the doping of Gd<sup>3+</sup> ions in the host lattice, Lu<sup>3+</sup> ions are substituted by larger Gd<sup>3+</sup> ions as a result of expansion in unit-cell volume leading to the diffraction peaks shift towards lower diffraction angles along the horizontal axis.<sup>1</sup> For Figure 3e and f, the peaks showed significantly wider than that of the samples with lower doping concentrations of Gd<sup>3+</sup> ions, indicating the size of crystal decreases with the increase of impurity ion concentration.

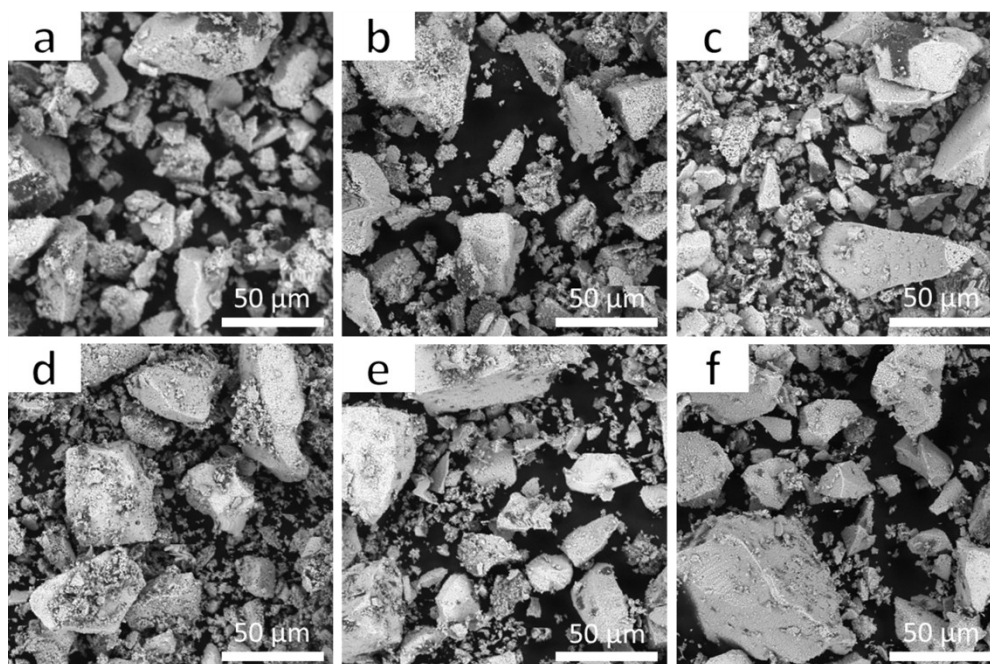

Fig. S3 SEM images of annealed NaLuF<sub>4</sub>:20%Yb<sup>3+</sup>, 0.5%Tm<sup>3+</sup>, x%Gd<sup>3+</sup> with (a) x=0, (b) x=3, (c) x=5, (d) x=10, (e) x=20, (f) x=30.

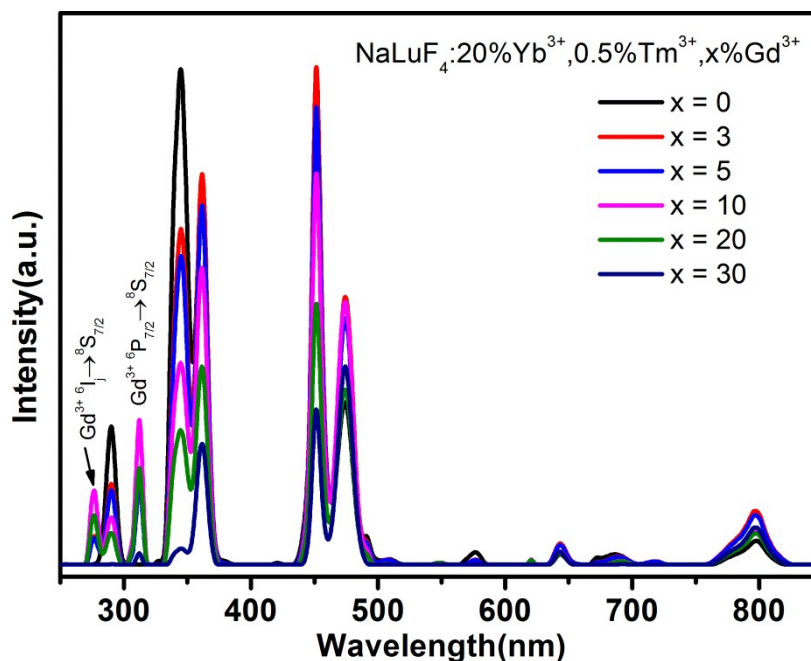

Fig. S4 Upconversion emission spectra of annealed NaLuF<sub>4</sub>:20%Yb<sup>3+</sup>, 0.5%Tm<sup>3+</sup>, x%Gd<sup>3+</sup> with (a) x=0, (b) x=3, (c)

x=5, (d) x=10, (e) x=20, (f) x=30.

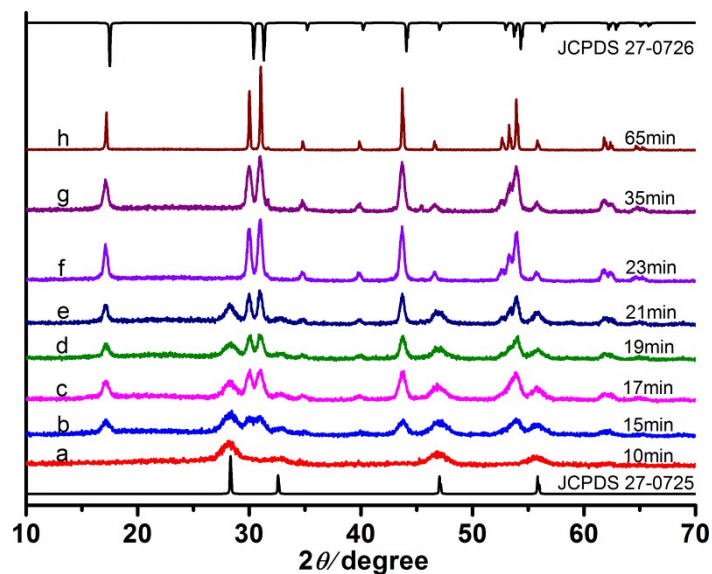

Fig. S5 XRD patterns of NaLuF<sub>4</sub>:20%Yb<sup>3+</sup>, 0.5%Tm<sup>3+</sup>, 10%Gd<sup>3+</sup> synthesized in different reaction time of (a) 10 min, (b) 15 min, (c) 17 min, (d) 19 min, (e) 21 min, (f) 23 min, (g) 35 min, (h) 65 min and the standard diffraction patterns for the α-phase NaLuF<sub>4</sub> (JCPDS 27-0725) and β-phase NaLuF<sub>4</sub> (JCPDS 27-0726).

Fig. S5 reveals the α→β phase transition and growth processes of NaLuF<sub>4</sub> NCs in detail through XRD analysis. With increasing the reaction time, α-NaLuF<sub>4</sub> transformed gradually into β-NaLuF<sub>4</sub> with the three main stages: pure α-NaLuF<sub>4</sub> at 10 min, coexistence of α-NaLuF<sub>4</sub> and β-NaLuF<sub>4</sub> from 15 to 21 min, and pure β-NaLuF<sub>4</sub> after 23 min. Notably in figure 5h, obvious narrowing of the diffraction peaks was observed which indicates the size of nanoparticles is relatively large, comparing well with the TEM image in Fig. 3g.

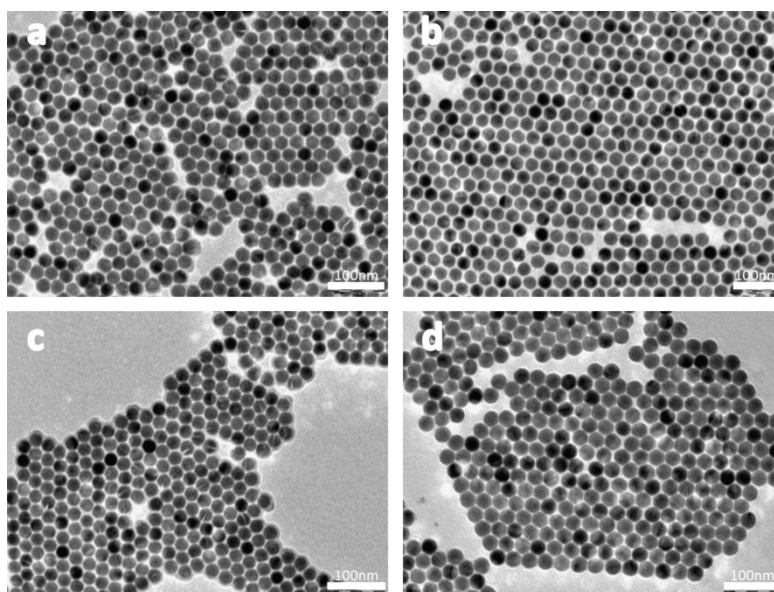

Fig. S6 TEM images of NaLuF<sub>4</sub>:20%Yb<sup>3+</sup>, 0.5%Tm<sup>3+</sup>, 10%Gd<sup>3+</sup> synthesized in different reaction time of (a) 25 min, (b) 35 min, (c) 45 min, (d) 55 min.

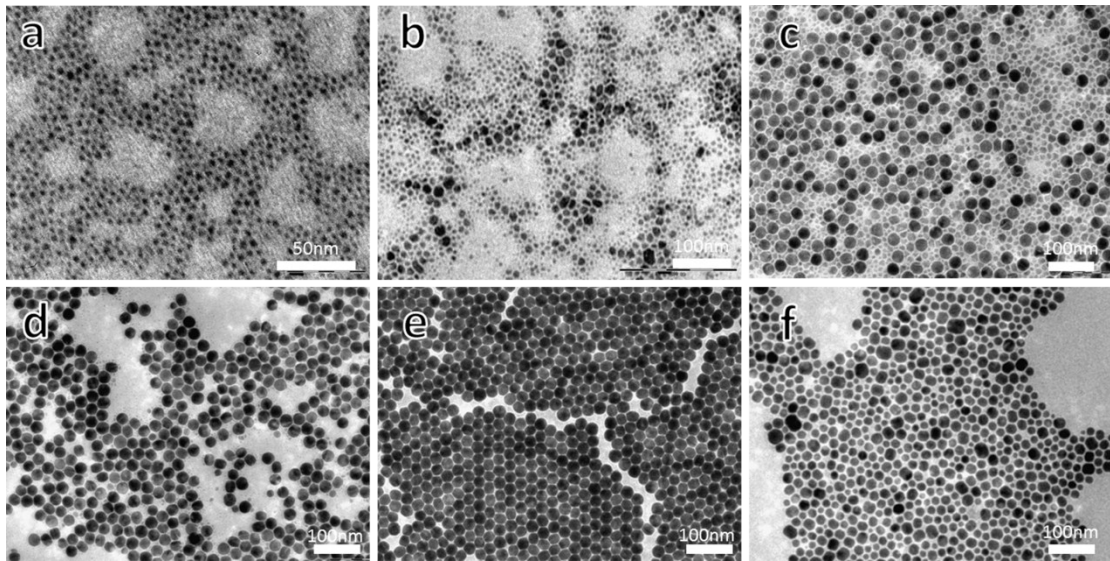

Fig. S7 TEM images of  $\text{NaLuF}_4:20\%Yb^{3+}, 0.5\%Tm^{3+}, 10\%Gd^{3+}$  synthesized at  $285\text{ }^\circ\text{C}$  in different reaction time of (a) 20 min, (b) 40 min, (c) 80 min, (d) 100 min, (e) 110 min, (f) 300 min.

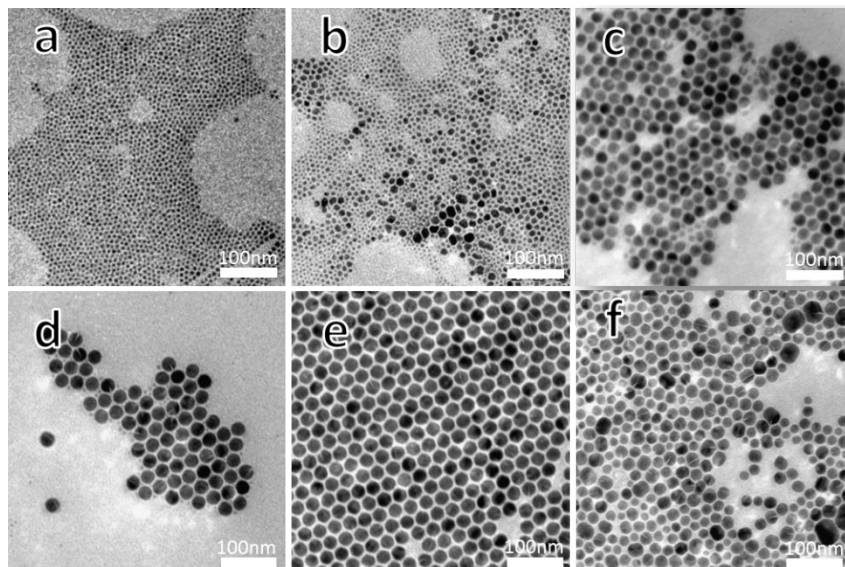

Fig. S8 TEM images of  $\text{NaLuF}_4:20\%Yb^{3+}, 0.5\%Tm^{3+}, 10\%Gd^{3+}$  synthesized at  $295\text{ }^\circ\text{C}$  in different reaction time of (a) 15 min, (b) 25 min, (c) 40 min, (d) 50 min, (e) 60 min, (f) 170 min.

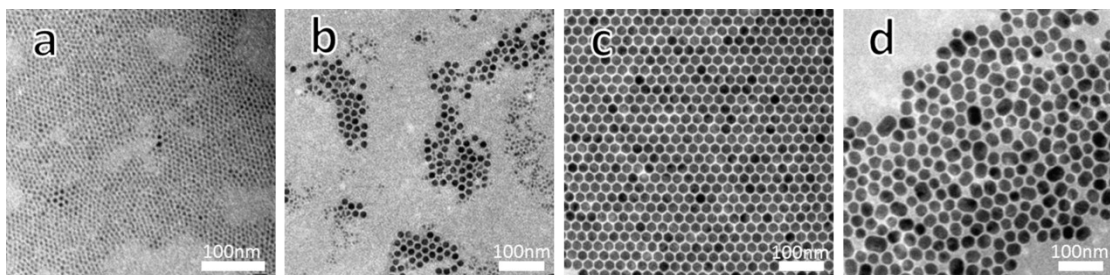

Fig. S9 TEM images of  $\text{NaLuF}_4:20\%Yb^{3+}, 0.5\%Tm^{3+}, 10\%Gd^{3+}$  synthesized at  $315\text{ }^\circ\text{C}$  in different reaction time of (a) 5 min, (b) 8 min, (c) 12 min, (d) 40 min.

## Reference

- S1. F. Wang, Y. Han, C. S. Lim, Y. Lu, J. Wang, J. Xu, H. Chen, C. Zhang, M. Hong and X. Liu, *Nature*, 2010, **463**, 1061-1065.
